# Supplementary material for: Next-Generation “-omics” Approaches Reveal a Massive Alteration of Host RNA Metabolism during Bacteriophage Infection of Pseudomonas aeruginosa
Source: PLoS Genet. 2016 Jul 5;12(7):e1006134. doi: 10.1371/journal.pgen.1006134 (PMC4933390; doi:10.1371/journal.pgen.1006134)
Supplement: S3 Table — This table shows the Log2(fold change) for all measured nucleotides over the course of PAK_P3 infection. In grey are those not significantly influenced, the color scale indicates the level of increase (green) or decrease (red) of the metabolite at the specific time point. Metabolite levels displaying more than 2-fold increase are highlighted in bold. (XLSX) [file pgen.1006134.s004.xlsx]

## Sheet: Sheet1
Class	KEGG ID	Compound	5min		10min		15min		20min		25min
			log2(FC)	p-value	log2(FC)	p-value	log2(FC)	p-value	log2(FC)	p-value	log2(FC)	p-value
Pyrimidine	C00055	CMP	0.535804	0.004882	0.469705	0.043091	0.384509	0.038687	0.550361	0.043258	0.731776	0.007926
	C00112	CDP	-0.031913	0.807874	0.218342	0.026316	0.589611	0.001128	0.961773	0.003387	1.27653	8.1e-05
	C00063	CTP	-0.632534	5.2e-05	-0.165299	0.06691	0.534629	0.013708	1.209	0.005004	1.61089	2.8e-05
	C00239	dCMP	0.868949	0.001457	0.89062	0.002274	0.795926	0.003136	1.49728	7e-05	2.03523	0.001099
	C00705	dCDP	0.470967	0.001457	0.799539	5e-06	0.983611	0.000146	2.01291	0.000434	2.74974	4.7e-05
	C00458	dCTP	-0.069926	0.575841	0.403506	7e-06	1.0454	0.00275	2.36383	0.001343	3.18044	2.1e-05
	C00364	dTMP	0.598835	0.038905	1.05233	0.001117	1.02082	0.019443	1.96785	0.000631	2.20108	0.002899
	C00459	dTTP	0.005724	0.952296	0.054624	0.430486	0.325268	0.006409	0.78824	0.000631	1.22213	0.000159
	C00365	dUMP	-0.038581	0.714506	-0.000625	0.993217	0.084324	0.377779	0.301714	0.001194	0.420905	0.005413
	C00105	UMP	0.312142	0.106363	0.272512	0.168846	0.462173	0.00666	0.706635	0.02538	0.624715	0.027704
	C00015	UDP	-0.373054	0.000461	-0.098006	0.357058	0.441063	0.036169	0.744162	0.004419	0.988399	0.000146
	C00075	UTP	-1.06012	0.000166	-0.402138	0.0142	0.451179	0.103181	1.03416	0.008312	1.37731	0.000135
Purine	C00020	AMP	0.965346	0.000322	0.51422	0.049859	-0.015661	0.965958	-0.189892	0.568613	-0.330041	0.259413
	C00008	ADP	0.477327	0.000461	0.377904	0.008917	0.288823	0.007045	0.36203	0.065982	0.379109	0.011082
	C00002	ATP	-0.379529	0.004591	-0.082196	0.460705	0.187685	0.322728	0.649938	0.024504	0.826356	2.7e-05
	C00360	dAMP	0.86579	0.000166	0.895392	0.000381	0.956263	0.000146	1.46524	0.000348	1.72799	0.001363
	C00206	dADP	0.688039	1e-06	0.9216	3e-06	1.32918	0.000552	2.18867	0.000434	2.59415	4.7e-05
	C00131	dATP	0.231558	0.004366	0.49106	3e-06	1.00813	0.001024	1.9803	0.001322	2.4624	1.4e-05
	C00144	GMP	0.622405	0.01046	0.518112	0.056573	0.338517	0.175438	0.350931	0.234759	0.279625	0.205862
	C00035	GDP	0.000932	0.993396	0.233297	0.07443	0.385315	0.003752	0.722935	0.0037	0.81416	7e-06
	C00362	dGMP	0.965346	0.000322	0.51422	0.049859	-0.015661	0.965958	-0.189892	0.568613	-0.330041	0.259413
	C00361	dGDP	0.477327	0.000461	0.377904	0.008917	0.288823	0.007045	0.36203	0.065982	0.379109	0.011082
	C00286	dGTP	-0.379529	0.004591	-0.082196	0.460705	0.187685	0.322728	0.649938	0.024504	0.826356	2.7e-05
